# Supplementary material
Source: HighWire-hosted journal article supplement (https://bmjopen.bmj.com/content/9/12/e030718)

**Appendix 1.** Absolute standardised mean differences of variables used in propensity score matching between patients right-sited to the Family Medicine Clinic (Intervention group) and their matched controls (Control group).

|                                                           | Intervention Mean | Control Mean | Standardised Mean Difference |
|-----------------------------------------------------------|-------------------|--------------|------------------------------|
| Age                                                       | 57.911            | 57.484       | 0.027                        |
| Gender: Female (Dummy)                                    | -                 | -            | -                            |
| Gender: Male                                              | 0.493             | 0.506        | -0.026                       |
| Ethnicity: Chinese (Dummy)                                | -                 | -            | -                            |
| Ethnicity: Malay                                          | 0.101             | 0.110        | -0.029                       |
| Ethnicity: Indian                                         | 0.092             | 0.102        | -0.035                       |
| Ethnicity: Others                                         | 0.057             | 0.056        | 0.006                        |
| Housing Type: 1-/2-room (Dummy)                           | -                 | -            | -                            |
| Housing Type: 3-room                                      | 0.192             | 0.184        | 0.019                        |
| Housing Type: 4-room                                      | 0.326             | 0.333        | -0.016                       |
| Housing Type: 5-room/Executive                            | 0.262             | 0.276        | -0.033                       |
| Housing Type: Private/Others                              | 0.213             | 0.194        | 0.047                        |
| Comorbidity: Asthma                                       | 0.037             | 0.038        | -0.008                       |
| Comorbidity: Diabetes                                     | 0.354             | 0.357        | -0.006                       |
| Comorbidity: Hyperlipidaemia                              | 0.636             | 0.654        | -0.037                       |
| Comorbidity: Hypertension                                 | 0.500             | 0.509        | -0.018                       |
| Comorbidity: Atrial Fibrillation                          | 0.058             | 0.051        | 0.030                        |
| Comorbidity: Heart Failure                                | 0.054             | 0.056        | -0.006                       |
| Comorbidity: Stroke                                       | 0.183             | 0.186        | -0.007                       |
| Comorbidity: Chronic Obstructive Pulmonary Disease        | 0.016             | 0.010        | 0.041                        |
| Comorbidity: Chronic Kidney Disease                       | 0.196             | 0.218        | -0.052                       |
| Comorbidity: Coronary Heart Disease                       | 0.187             | 0.181        | 0.014                        |
| Comorbidity: Osteoporosis                                 | 0.035             | 0.034        | 0.008                        |
| Comorbidity: Spine Fracture                               | 0.012             | 0.015        | -0.027                       |
| Comorbidity: Hip Fracture                                 | 0.007             | 0.009        | -0.018                       |
| Specialty Department: Cardiology                          | 0.127             | 0.165        | -0.118                       |
| Specialty Department: Endology                            | 0.262             | 0.240        | 0.048                        |
| Specialty Department: Gastrology                          | 0.253             | 0.243        | 0.024                        |
| Specialty Department: Neurology                           | 0.218             | 0.203        | 0.036                        |
| Specialty Department: Rheumatology                        | 0.140             | 0.151        | -0.029                       |
| Pre-Enrolment SOC Attendances                             | 10.060            | 9.772        | 0.024                        |
| Pre-Enrolment Polyclinic Attendances                      | 5.899             | 6.442        | -0.065                       |
| Pre-Enrolment Emergency Department Attendances            | 1.256             | 1.295        | -0.013                       |
| Pre-Enrolment Emergency Admissions                        | 0.806             | 0.845        | -0.019                       |
| Pre-Enrolment Non-Day Surgery Inpatient Admissions        | 0.892             | 0.930        | -0.017                       |
| Pre-Enrolment Non-Day Surgery Inpatient Admissions LOS    | 4.551             | 4.446        | 0.008                        |
| Pre-Enrolment All-Cause Admissions                        | 1.263             | 1.313        | -0.020                       |
| Pre-Enrolment All-Cause Admissions LOS                    | 4.923             | 4.829        | 0.007                        |
| Pre-Enrolment SOC Attendance Charges                      | 1340.18           | 1306.74      | 0.020                        |
| Pre-Enrolment Polyclinic Attendance Charges               | 483.77            | 532.46       | -0.056                       |
| Pre-Enrolment Emergency Department Attendance Charges     | 390.38            | 392.57       | -0.002                       |
| Pre-Enrolment Emergency Admission Charges                 | 4895.34           | 5296.61      | -0.029                       |
| Pre-Enrolment Non-Day Surgery Inpatient Admission Charges | 5700.81           | 6121.50      | -0.025                       |
| Pre-Enrolment All-Cause Admission Charges                 | 6090.92           | 6522.01      | -0.025                       |

SOC=specialist outpatient clinic; LOS=inpatient length of stay.

**Appendix 2.** (a) Jitter plots and (b) histogram plots of propensity scores in the patients right-sited to the Family Medicine Clinic (Intervention group), their matched controls (Control group), and unmatched control pool of patients.

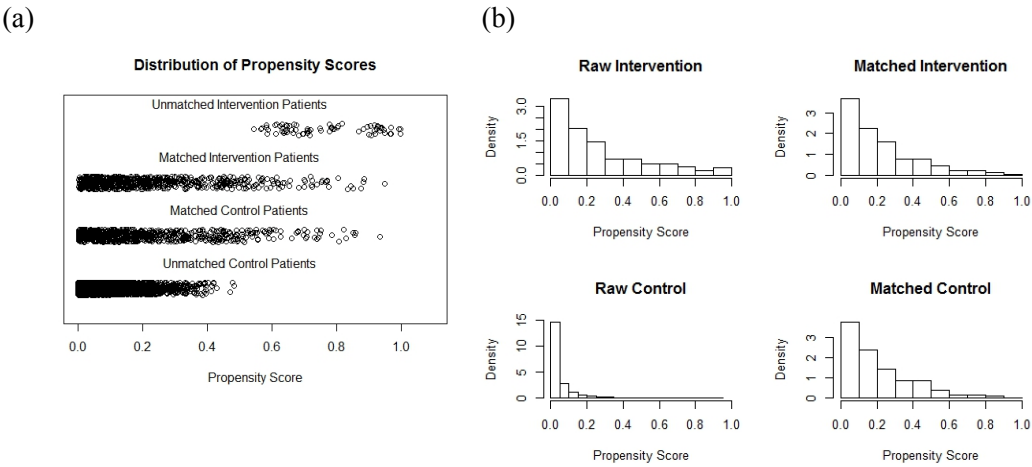

Supplement: inline-supplementary-material-1 [file inline-supplementary-material-1.pdf]
