# Supplementary material
Source: HighWire-hosted journal article supplement (https://bmjopen.bmj.com/content/9/12/e030718)
Supplement: inline-supplementary-material-2 [file inline-supplementary-material-2.pdf]

### Technical Appendix

#### A. Description of the Zero-inflated Negative Binomial (ZINB) model for modelling healthcare utilisation frequency

The ZINB model consists of two parts:

- i. a logistic regression model to model the probability of excess zero, or those not incurring utilisation of a specific healthcare service, **i.e. potential non-users**, and
- ii. a negative binomial model to model the frequency of utilisation of a specific healthcare service among patients **with potential** of incurring utilization, **i.e. potential users**.

The logistic model can be expressed by:

$$\text{logit}(p) = \beta_0 + \beta_1 \text{INT} + \beta_2 \text{BASELINE} + \beta_3 \text{PS}$$

where

$p$  = probability of excess zero for the specific healthcare service post – enrolment

$\text{INT}$  = indicator variable for patient enrolled in the intervention

$\text{BASELINE}$  = log transformed pre – enrolment utilisation with 0.5 added to zero values

$\text{PS}$  = propensity score  $\left( i.e. \frac{\exp(\mathbf{X}'\hat{\boldsymbol{\varphi}})}{1 + \exp(\mathbf{X}'\hat{\boldsymbol{\varphi}})} \right)$  where  $\mathbf{X}$  is a matrix of matched variables and  $\hat{\boldsymbol{\varphi}}$  vector of the corresponding estimated parameters

For patients enrolled in the intervention, the odds of being ‘not-at-risk’ of incurring utilisation of a service would be  $\exp(\beta_1)$  times the odds of patients who were not enrolled.

The negative binomial model can be expressed by:

$$\log(\mu) = \gamma_0 + \gamma_1 \text{INT} + \gamma_2 \text{BASELINE} + \gamma_3 \text{PS} + \log(\text{TIME})$$

where

$\text{INT}$ ,  $\text{BASELINE}$  and  $\text{PS}$  have been defined

$\mu$  = mean frequency of the specific healthcare service post – enrolment given covariate

$\text{TIME}$  = follow – up time

For patients enrolled in the intervention, the incidence rate of utilisation frequency would be  $\exp(\gamma_1)$  times the incidence rate of patients who were not enrolled.

### B. Description of the two-part model (*twopm*) for modelling healthcare charges

The *twopm* consists of

- i. a probit regression model to model the probability of zero, or not incurring the specific healthcare charges, and
- ii. a generalized linear model with log-link and gamma family to model charges of the specific healthcare service among patients incurring some charges.

The probit model can be expressed by:

$$\Phi^{-1}(q) = \beta_0 + \beta_1 INT + \beta_2 BASELINE + \beta_3 PS$$

where

*INT*, *BASELINE* and *PS* have been defined

$\Phi^{-1}$  = the probit function (i.e. inverse cumulative distribution function for standard normal)

*q* = probability of zero charges for the specific healthcare service post – enrolment

For patients enrolled in the intervention, the marginal effect (marginal probability) of zero charge for a specific healthcare service would be  $\Phi(\hat{\beta}_0 + \hat{\beta}_1 + \hat{\beta}_2 \overline{BASELINE} + \hat{\beta}_3 \overline{PS})$ , where  $\overline{BASELINE}$  and  $\overline{PS}$  are mean values. For patients not enrolled in the intervention, the marginal effect would be  $\Phi(\hat{\beta}_0 + \hat{\beta}_2 \overline{BASELINE} + \hat{\beta}_3 \overline{PS})$ .

The generalized linear model with log-link and gamma family can be expressed by:

$$\log(\pi) = \gamma_0 + \gamma_1 INT + \gamma_2 BASELINE + \gamma_3 PS + \log(TIME)$$

where

*INT*, *BASELINE*, *PS* and *TIME* have been defined

$\pi$  = mean charges of the specific healthcare service post – enrolment given covariate

For patients enrolled in the intervention, their mean healthcare charges would be  $\exp(\gamma_1)$  times that of patients who were not enrolled.
